# Supplementary material
Source: PubMed Central journal article supplement (PMC2957299)
Supplement: NIHMS91126-supplement-1_si_001.pdf [file NIHMS91126-supplement-1_si_001.pdf]

**Table S1.** Pyranose ring  $^3J_{\text{HH}}$ -values

| Methyl $\alpha$ -(2,8)-disialoside |                |                 |                |                 |            |                 |
|------------------------------------|----------------|-----------------|----------------|-----------------|------------|-----------------|
|                                    | Residue a      |                 | Residue b      |                 |            |                 |
|                                    | Experiment     | Conventional MD | Experiment     | Conventional MD | Experiment | Conventional MD |
| H3ax – H4                          | 12.2 $\pm$ 0.1 | 11.0 $\pm$ 0.7  | 12.2 $\pm$ 0.1 | 11.0 $\pm$ 0.7  |            |                 |
| H3eq – H4                          | 4.4 $\pm$ 0.4  | 4.6 $\pm$ 1.2   | 4.4 $\pm$ 0.4  | 4.5 $\pm$ 1.2   |            |                 |
| H4 – H5                            | 10.2 $\pm$ 0.1 | 9.4 $\pm$ 0.8   | 10.3 $\pm$ 0.1 | 9.6 $\pm$ 0.7   |            |                 |
| H5 – H6                            | 10.2 $\pm$ 0.1 | 10.4 $\pm$ 0.5  | 10.3 $\pm$ 0.1 | 10.4 $\pm$ 0.4  |            |                 |

  

| Methyl $\alpha$ -(2,8)-trisialoside |                |                 |                |                 |                |                 |
|-------------------------------------|----------------|-----------------|----------------|-----------------|----------------|-----------------|
|                                     | Residue a      |                 | Residue b      |                 | Residue c      |                 |
|                                     | Experiment     | Conventional MD | Experiment     | Conventional MD | Experiment     | Conventional MD |
| H3ax – H4                           | 12.3 $\pm$ 0.1 | 10.8 $\pm$ 1.3  | 12.3 $\pm$ 0.1 | 11.0 $\pm$ 0.7  | 12.3 $\pm$ 0.1 | 11.0 $\pm$ 0.7  |
| H3eq – H4                           | 4.3 $\pm$ 0.4  | 4.6 $\pm$ 1.2   | 4.3 $\pm$ 0.4  | 4.5 $\pm$ 1.2   | 4.3 $\pm$ 0.4  | 4.5 $\pm$ 1.2   |
| H4 – H5                             | 10.3 $\pm$ 0.1 | 9.4 $\pm$ 0.9   | 10.3 $\pm$ 0.1 | 9.5 $\pm$ 0.7   | 10.3 $\pm$ 0.1 | 9.6 $\pm$ 0.7   |
| H5 – H6                             | 10.3 $\pm$ 0.1 | 10.4 $\pm$ 0.4  | 10.3 $\pm$ 0.1 | 10.4 $\pm$ 0.4  | 10.3 $\pm$ 0.1 | 10.4 $\pm$ 0.4  |
